# Supplementary material
Source: PubMed Central journal article supplement (PMC1794222)
Supplement: NIHMS16285-supplement-SuppTable.pdf [file NIHMS16285-supplement-SuppTable.pdf]

**Table S1. Genes used in this study and associated RNAi phenotypes**

| Gene name                  | ORF name (LG)  | Reported RNAi phenotypes                                                                                                                                                                 |
|----------------------------|----------------|------------------------------------------------------------------------------------------------------------------------------------------------------------------------------------------|
| <i>cdk-1</i>               | T05G5.3 (III)  | Emb (Kamath et al., 2003; Piano et al., 2000; Gonczy et al., 2000; Wallenfang and Seydoux, 2000; Simmer et al., 2003; Boxem et al., 1999), Ste (Kamath et al., 2003; Piano et al., 2000) |
| <i>cyb-1</i>               | ZC168.4 (IV)   | Emb (Piano et al., 2000), Ste (Piano et al., 2000)                                                                                                                                       |
| <i>cyb-2.1*</i>            | Y43E12A.1 (IV) | Emb (Piano et al., 2000; Simmer et al., 2003; Maeda et al., 2001), Ste (Piano et al., 2000)                                                                                              |
| <i>cyb-2.2*</i>            | H31G24.4 (I)   | Emb (Piano et al., 2000)                                                                                                                                                                 |
| <i>cyb-3</i>               | T06E6.2 (V)    | Emb (Kamath et al., 2003; Piano et al., 2000; Simmer et al., 2003)                                                                                                                       |
| <i>wee-1.1</i>             | F35H8.7 (II)   | WT (this study)                                                                                                                                                                          |
| <i>wee-1.2<sup>†</sup></i> | C01G12.4 (II)  | none (this study)                                                                                                                                                                        |
| <i>wee-1.3</i>             | Y53C12A.1 (II) | Emb (Kamath et al., 2003; Piano et al., 2000), Ste (Kamath et al., 2003; Piano et al., 2000; Maeda et al., 2001), Ooc (Detwiler et al., 2001)                                            |

\**cyb-2.1* and -2.2 share 87% identity; the major difference between the two is that H31G24.4 has a 24 residue insert that is absent in Y43E12A.1 (Nieduszynski et al., 2002).

<sup>†</sup>This gene is predicted to be a pseudogene by The Genome Consortium (see Materials and methods).

LG, linkage group; Emb, embryonic lethal; Ste, sterile; Ooc, oocyte formation abnormal.

**Table S2. WEE-1.3 depletion results in chromosome coalescence**

| Strain               | RNAi condition     | RNAi duration | Chromatin coalescence/stringy phenotype |         |         |         |         |         |        |        | Total gonad arms analyzed (n) |
|----------------------|--------------------|---------------|-----------------------------------------|---------|---------|---------|---------|---------|--------|--------|-------------------------------|
|                      |                    |               | Oocyte position                         |         |         |         |         |         |        |        |                               |
|                      |                    |               | -1                                      | -2      | -3      | -4      | -5      | -6      | -7     | -8     |                               |
| N2                   | None               |               | 0                                       | 0       | 0       | 0       | 0       | 0       | 0      | 0      | 90                            |
| N2                   | <i>wee-1.3</i> fed | 28-32 hours   | 51 (+1)                                 | 31 (+2) | 19 (+1) | 5 (+1)  | 2       | 1       | 1      | 1      | 57                            |
| H2B::GFP             | None               |               | 0                                       | 0       | 0       | 0       | 0       | 0       | 0      | 0      | 53                            |
| H2B::GFP             | <i>wee-1.3</i> fed | 24-28 hours   | 59                                      | 51 (+4) | 37 (+3) | 21 (+8) | 18 (+4) | 4 (+6)  | 4 (+3) | 1 (+2) | 60                            |
| H2B::GFP             | <i>wee-1.3</i> fed | 31-32 hours   | 21                                      | 20      | 17      | 10      | 6 (+1)  | 1 (+1)  | 0      | 0      | 22                            |
| H2B::GFP             | <i>wee-1.3</i> fed | 41-52 hours   | 25                                      | 21      | 17      | 13      | 12      | 6 (+1)  | 4      | 3 (+1) | 27                            |
| <i>fog-2</i> unmated | None               |               | 0                                       | 0       | 0       | 0       | 0       | 0       | 0      | 0      | 93                            |
| <i>fog-2</i> unmated | <i>wee-1.3</i> fed | 43-48 hours   | 0                                       | 0       | 0       | 0       | 0       | 0       | 0      | 0      | 71                            |
| <i>fog-2</i> mated   | None               |               | 0                                       | 0       | 0       | 0       | 0       | 0       | 0      | 0      | 36                            |
| <i>fog-2</i> mated   | <i>wee-1.3</i> fed | 43-48 hours   | 35                                      | 31      | 27 (+2) | 18 (+1) | 13 (+3) | 10 (+1) | 6 (+1) | 2 (+1) | 35                            |

N2 is the wild-type strain. Transgenic animals expressing a histone H2B::GFP fusion protein are indicated as H2B::GFP. Mutants homozygous for *fog-2* do not make sperm and essentially are female. The chromosome morphology of oocytes in positions -1 through -8 was monitored by DAPI or GFP fluorescence. The oocyte chromosomes of untreated hermaphrodites and WEE-1.3-depleted *fog-2* females remain in diakinesis. Numbers in parentheses represent oocytes with stringy chromosomes.
